# Supplementary material for: Novel ternary Zintl phosphide halides Ba3P5X (X = Cl, Br) with 1D helical phosphorus chains: synthesis, crystal and electronic structure
Source: Royal Society of Chemistry journal article supplement (doi:10.1039/d3nr06492a), 2024-01-01
Supplement: d3nr06492a1.pdf [file d3nr06492a1.pdf]

## Electronic Supplementary Information (ESI)

### **Novel Ternary Zintl Phosphide Halides $Ba_3P_5X$ ( $X = Cl, Br$ ) with 1D Helical Phosphorus Chains: Synthesis, Crystal and Electronic Structure**

Mohd Ishtiyak,<sup>a</sup> S. M. Gayomi K. Samarakoon,<sup>a</sup> Thimira Kandabadage Don,<sup>a</sup> Spencer R. Watts,<sup>a</sup> Sviatoslav Baranets\*<sup>a</sup>

<sup>a</sup> Department of Chemistry, Louisiana State University, Baton Rouge, Louisiana, 70803, United States

\* Correspondence: sbaranets@lsu.edu; Tel.: +1- 225-578-5078

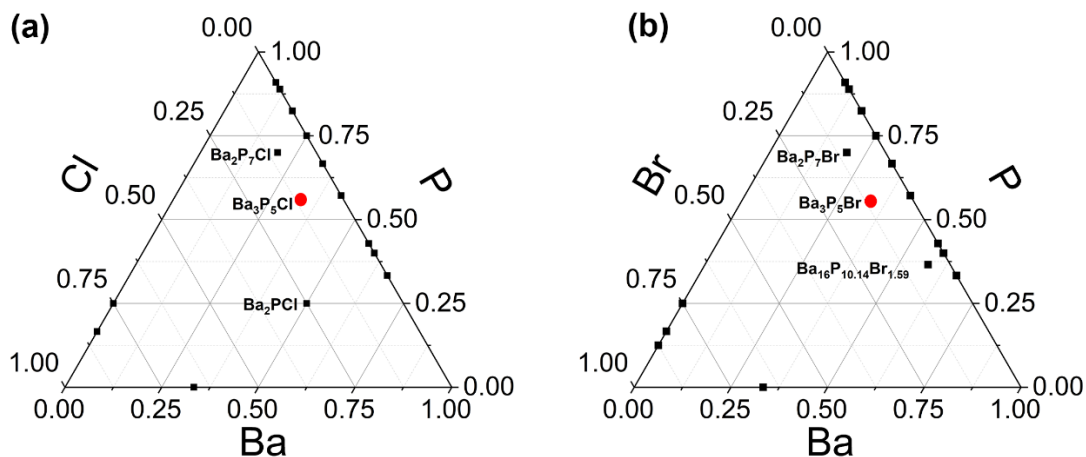

**Fig. S1** Compositional diagrams of ternary systems Ba–P–Cl (a) and Ba–P–Br (b). The novel phases  $Ba_3P_5Cl$  and  $Ba_3P_5Br$  are marked as red circles in (a) and (b). In each compositional diagram, the reported ternary compounds are displayed with black squares, while reported binary compounds are marked as black squares.

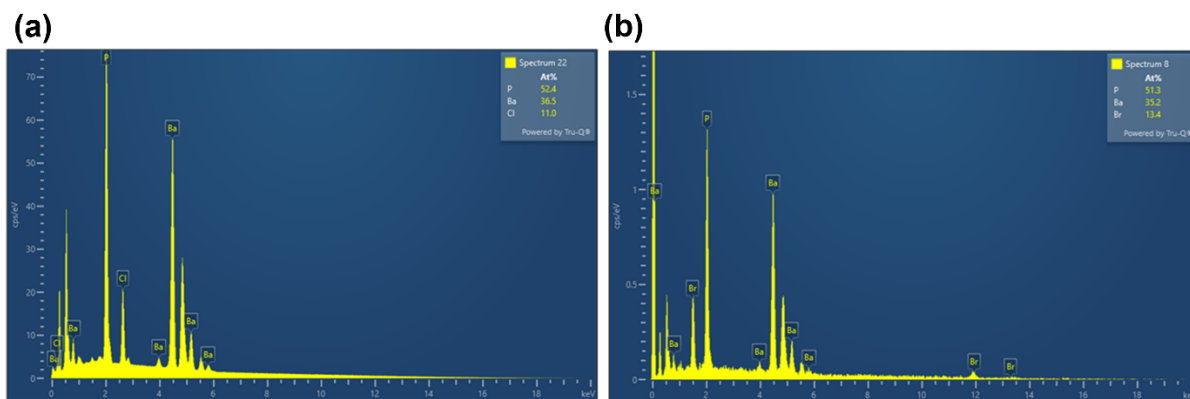

**Fig. S2** Representative EDS spectra of  $Ba_3P_5Cl$  (a) and  $Ba_3P_5Br$  (b).

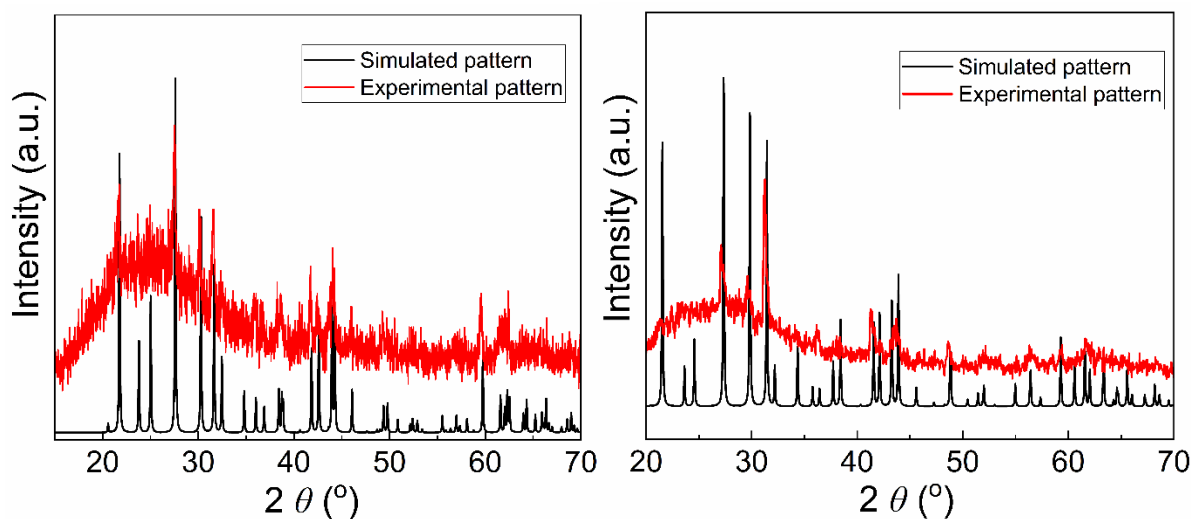

**Fig S3.** Powder X-ray diffraction patterns of representative  $Ba_3P_5Cl$  (left) and  $Ba_3P_5Br$  (right) samples. The polycrystalline material was prepared in the glovebox by grinding flux-grown crystals.

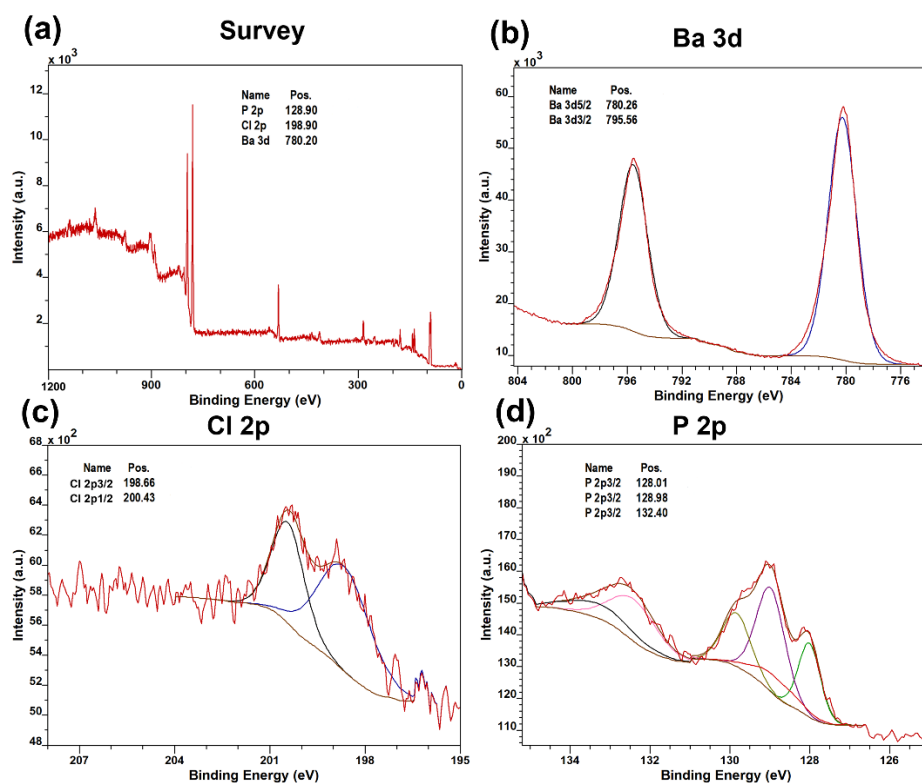

**Fig. S4** (a) XPS survey spectrum of polycrystalline  $\text{Ba}_3\text{P}_5\text{Cl}$  sample. The high-resolution spectra of (b) Ba 3d, (c) Cl 2p and (d) P 2p.

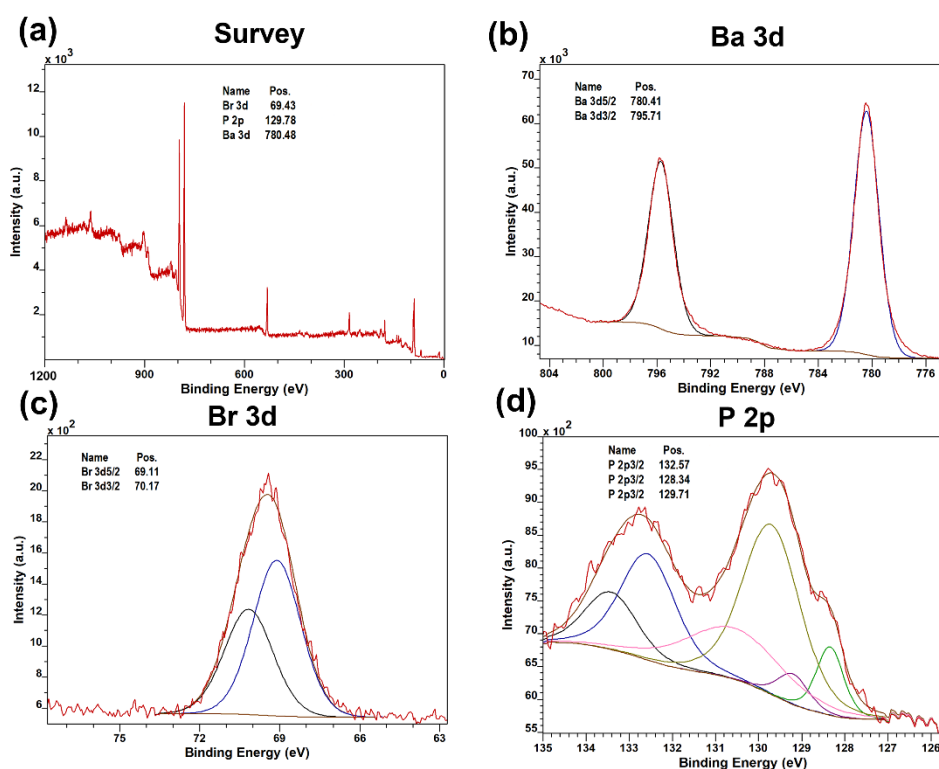

**Fig. S5** (a) XPS survey spectrum of polycrystalline  $\text{Ba}_3\text{P}_5\text{Br}$  sample. The high-resolution spectra of (b) Ba 3d, (c) Br 3d and (d) P 2p.

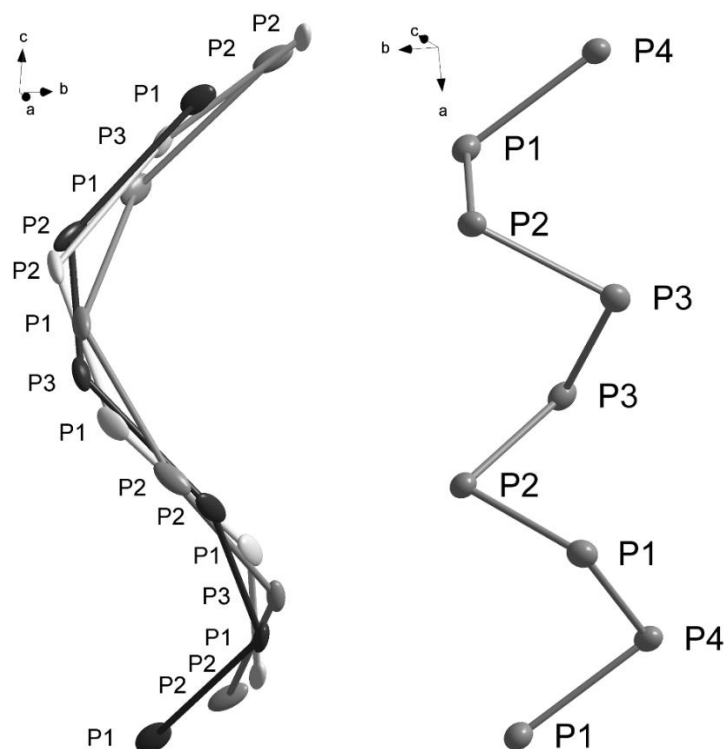

**Fig S6.** (Left) Propagation of the  ${}^1_{\infty}[P]$  infinite chain along  $c$ -axis. The disordered helix is represented as a superposition of three symmetry copies of the same ordered chain sequenced to the  $\{P1-P1-P2-P3-P2\}$  fragment. Three three chains are colored as black, dark gray, and light gray. (Right) The representations of the  ${}^1_{\infty}[P]$  infinite chain in SnPl.

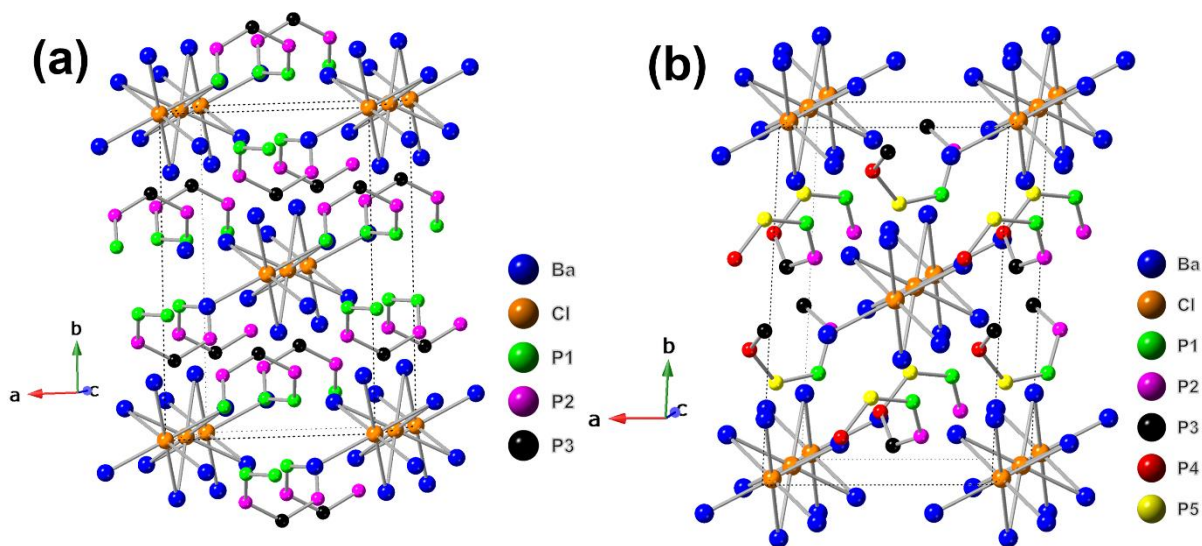

**Fig S7.** (a) and (b) depict unit cell view of the  $Ba_3P_5Cl$  model in space groups  $C2/c$  and  $Cc$ , respectively, approximately along the  $c$ -direction. Note, that all atoms are fully occupied.

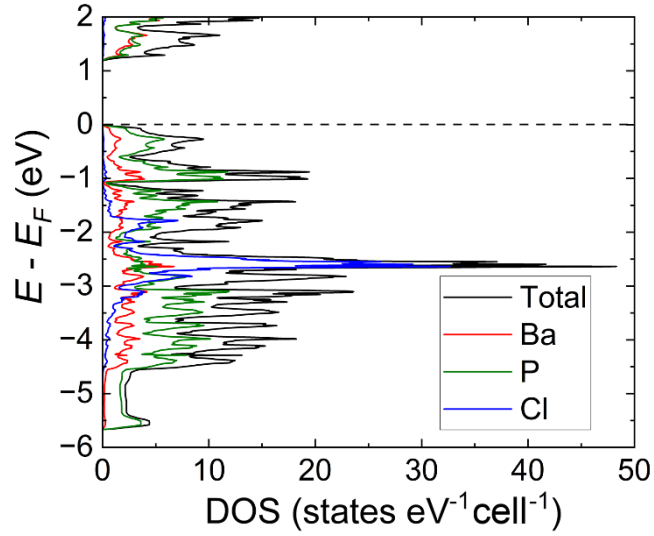

**Fig S8.** Total (black trace) and projected density of states for the atoms Ba (red trace), P (green trace), and Cl (blue trace) for  $\text{Ba}_3\text{P}_5\text{Cl}$  model (Space group =  $Cc$ ). The dashed line at 0 eV shows the Fermi level as a point of reference.

**Table S1** Unit cell parameters of  $\text{Ba}_3\text{P}_5\text{X}$  ( $X = \text{Cl}, \text{Br}$ ) and  $\text{Ba}_3\text{P}_5\text{Cl}$  in space group  $C2/c$  and  $Cc$ , respectively obtained from ISODISTORT program suite and used for the electronic structure calculations.

| Lattice parameters | $\text{Ba}_3\text{P}_5\text{Cl}$ | $\text{Ba}_3\text{P}_5\text{Br}$ |
|--------------------|----------------------------------|----------------------------------|
| Space group        | $C2/c$ and $Cc$                  | $C2/c$                           |
| $a/(\text{\AA})$   | 9.9393                           | 10.0348                          |
| $b/(\text{\AA})$   | 14.9481                          | 15.0450                          |
| $c/(\text{\AA})$   | 7.3954                           | 7.5370                           |
| $\beta/^\circ$     | 119.738                          | 120.047                          |

**Table S2** Fractional atomic coordinates for  $\text{Ba}_3\text{P}_5\text{Cl}$  (Space group =  $C2/c$ ) used for the electronic structure calculations.

| Atoms | $x$    | $y$    | $z$           |
|-------|--------|--------|---------------|
| Ba1   | 0.2769 | 0.0923 | 0.4346        |
| Ba2   | 0      | 0.8154 | $\frac{1}{4}$ |
| P1    | 0.3987 | 0.1088 | 0.0858        |
| P2    | 0.1562 | 0.2997 | 0.1668        |
| P3    | 0      | 0.2379 | $\frac{1}{4}$ |
| Cl1   | 0      | 0      | $\frac{1}{2}$ |

**Table S3** Fractional atomic coordinates for  $\text{Ba}_3\text{P}_5\text{Br}$  (Space group =  $C2/c$ ) used for the electronic structure calculations.

| Atoms | $x$    | $y$    | $z$           |
|-------|--------|--------|---------------|
| Ba1   | 0.2835 | 0.0945 | 0.4390        |
| Ba2   | 0      | 0.8110 | $\frac{1}{4}$ |
| P1    | 0.3975 | 0.1075 | 0.0880        |
| P2    | 0.1573 | 0.3004 | 0.1665        |
| P3    | 0      | 0.2360 | $\frac{1}{4}$ |
| Br1   | 0      | 0      | $\frac{1}{2}$ |

**Table S4** Fractional atomic coordinates for Ba<sub>3</sub>P<sub>5</sub>Cl (Space group = Cc) used for the electronic structure calculations.

| Atoms | x      | y      | z      |
|-------|--------|--------|--------|
| Ba1   | 0.2769 | 0.0923 | 0.6846 |
| Ba2   | 0.2231 | 0.5923 | 0.3154 |
| Ba3   | 0      | 0.1846 | 0      |
| P1    | 0.3715 | 0.2280 | 0.0603 |
| P2    | 0.3569 | 0.1190 | 0.2379 |
| P3    | 0.0277 | 0.4283 | 0.0391 |
| P4    | 0.1372 | 0.3551 | 0.3283 |
| P5    | 0.0362 | 0.2538 | 0.4541 |
| Cl1   | 0      | 0      | 1/4    |
